# Supplementary material
Source: PubMed Central journal article supplement (PMC3104755)
Supplement: JCI45403sd.pdf [file JCI45403sd.pdf]

## Supplemental figures

### **Supplemental figure 1. FTY720 treatment does not affect the association between**

**S1P<sub>1</sub> and WWP2. A, effect of FTY720P treatment.** HEK293 cells expressing S1P<sub>1</sub>-GFP or S1P<sub>1</sub>-S5A-GFP or S1P<sub>1</sub>-K4R-GFP were treated with FTY720P or not for 30 min. Cell extracts were immunoprecipitated (IP) with anti-S1P<sub>1</sub> antibody followed by an immunoblot (IB) analysis with anti-WWP2 antibody.

### **Supplemental figure 2. Effect of S1P and FTY720P treatment on S1P<sub>1</sub> degradation in**

**WWP2-expressing HEK293 cells.** HEK293 cells expressing S1P<sub>1</sub>-GFP were transfected with a WWP2 expression vector and treated with S1P (200 nM) or FTY720P (100 nM) for indicated time periods. Expression of S1P<sub>1</sub> and WWP2 were analyzed by immunoblot analysis of total cell extracts.

### **Supplemental figure 3. Effect of E3 ubiquitin ligases NEDD4-1, NEDD4-2, Cbl, or AIP4**

**over-expression on FTY720P-induced S1P<sub>1</sub> degradation.** HEK293 cells expressing S1P<sub>1</sub>-GFP were transfected with indicated E3 ubiquitin ligase expression vectors, and treated with FTY720P (100 nM) for indicated time periods. Expression of S1P<sub>1</sub> was determined by immunoblot analysis of total cell extracts.

### **Supplemental figure 4. Effect of FTY720P on S1P<sub>1</sub> mutants in WWP2 expressing**

**HEK293 cells.** HEK293 cells expressing S1P<sub>1</sub>-S5A-GFP or S1P<sub>1</sub>-K4R-GFP were transfected with WWP2 expression vector and treated with FTY720P (100 nM) for indicated time periods. Expression of S1P<sub>1</sub> mutants was determined by immunoblot analysis as described.

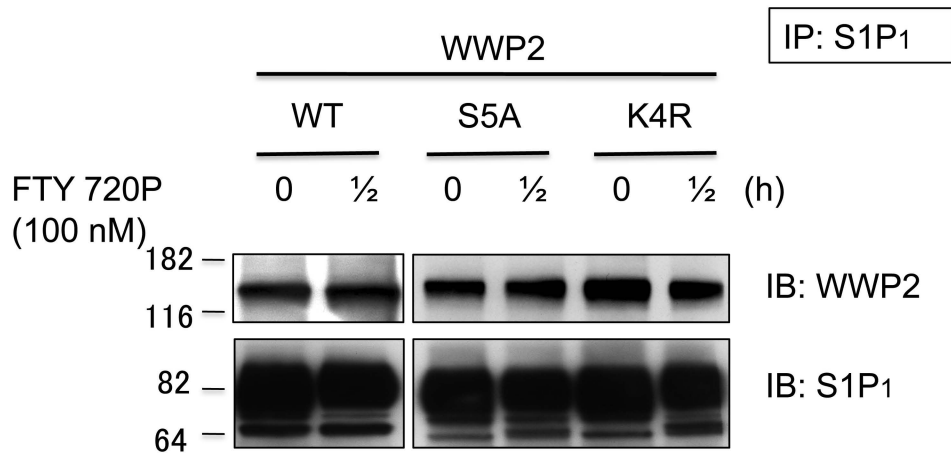

**supplemental figure 1**

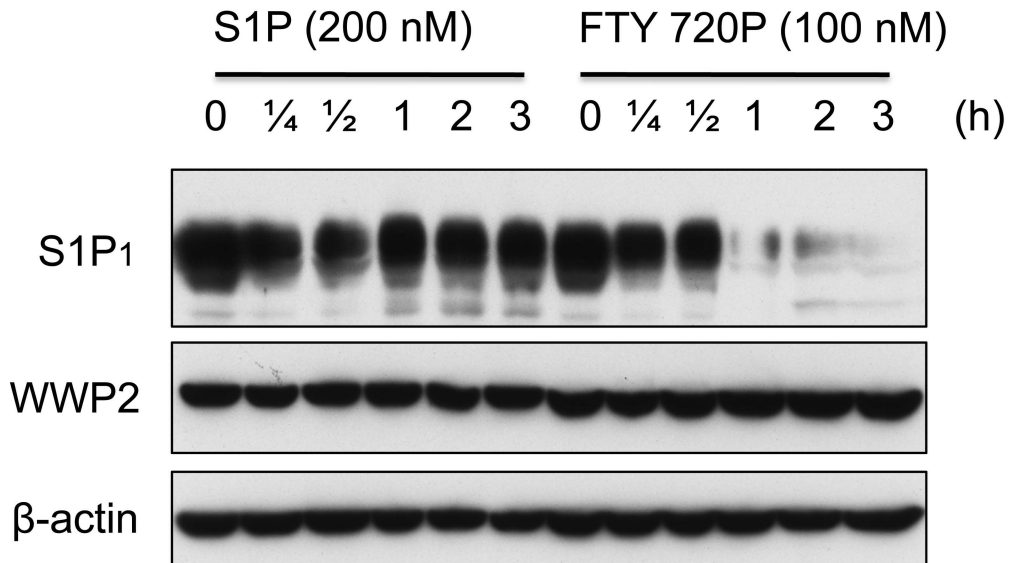

Supplemental figure 2

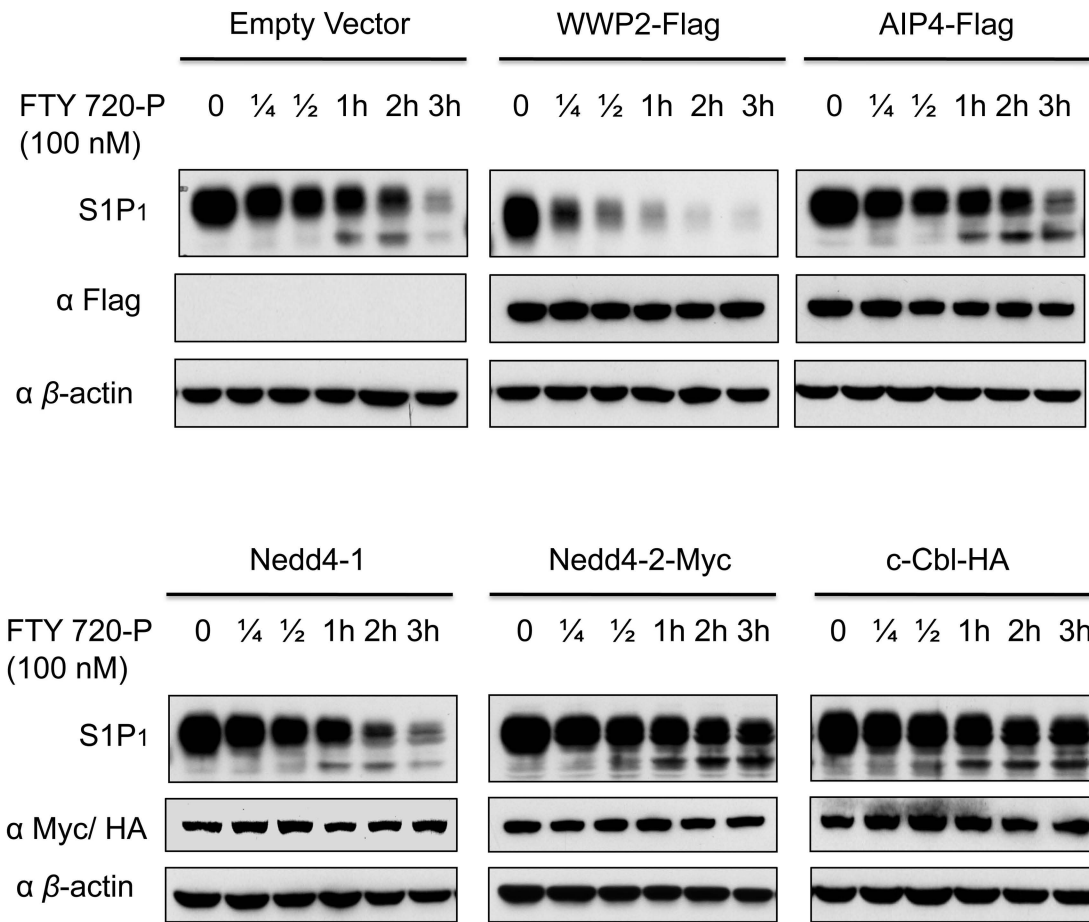

supplemental figure 3

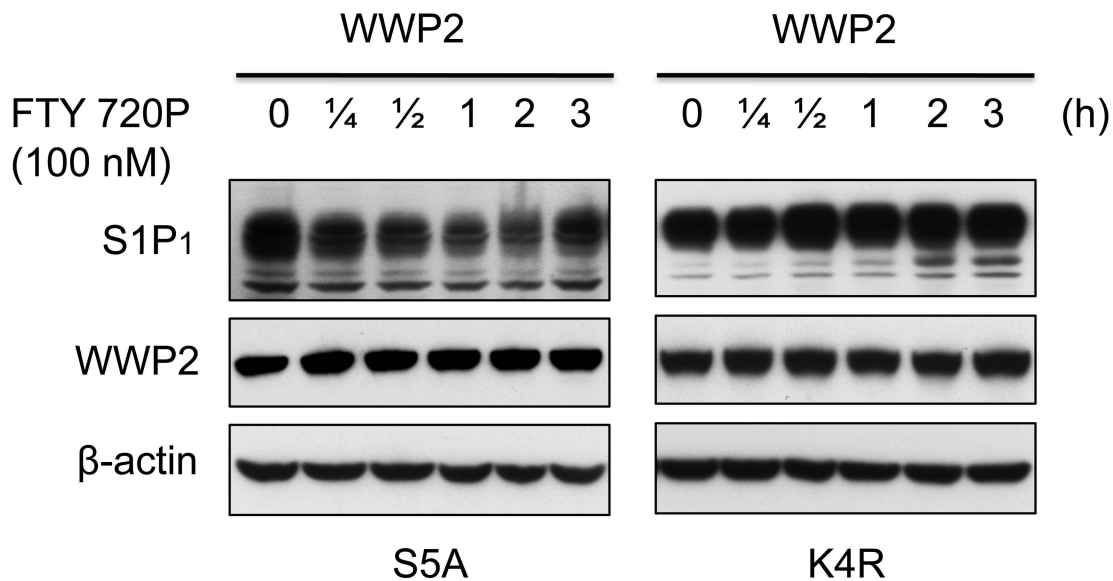

Supplemental figure 4
